# Supplementary material for: Au@carbon dot nanoconjugates as a dual mode enzyme-free sensing platform for cholesterol
Source: Royal Society of Chemistry journal article supplement (doi:10.1039/c7tb01345k), 2017-01-01
Supplement: c7tb01345k1.pdf [file c7tb01345k1.pdf]

### Supplementary Information

## **Au@carbon dot nanoconjugates as dual mode enzyme-free sensing platform for Cholesterol**

Eepsita Priyadarshini<sup>1</sup>, and Kamla Rawat<sup>2, 3\*</sup>

<sup>1</sup>School of Physical Sciences, Jawaharlal Nehru University, New Delhi, India

<sup>2</sup>Special Centre for Nano Sciences, Jawaharlal Nehru University, New Delhi, India

<sup>3</sup>Inter University Accelerator Centre, New Delhi, India

Corresponding Author Email: [kamla.jnu@gmail.com](mailto:kamla.jnu@gmail.com)

Tel: +91 11 2674 4637; Fax: +91 11 2674 1837

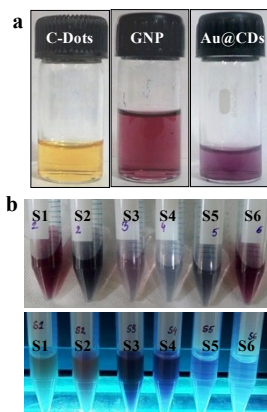

**Figure S1:** Photographs of C-dots, GNP only and Au@CDs and pictures of Au@CDs synthesized at varying HAuCl<sub>4</sub> concentration taken under daylight and UV light.

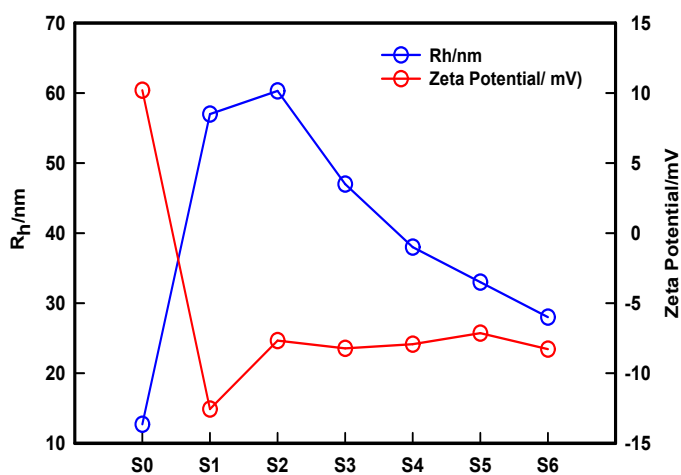

**Figure S2:** Plot showing the zeta potential and hydrodynamic radius of particles synthesized at different  $\text{HAuCl}_4$  concentration.

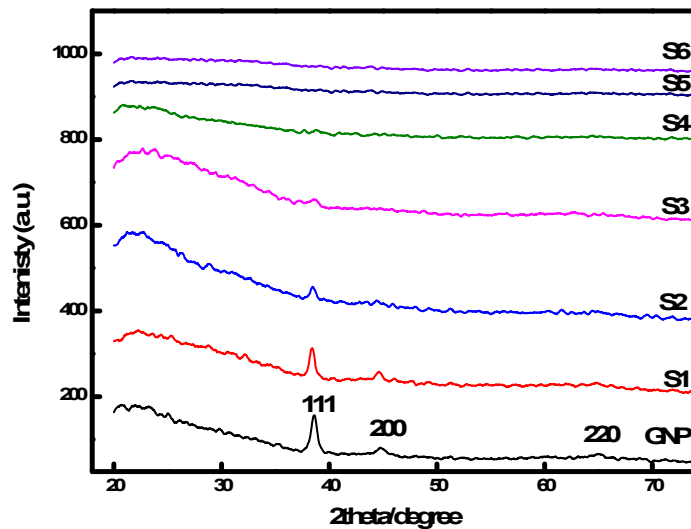

**Figure S3:** XRD spectra of GNP and Au@CDs synthesized at varying concentration of  $\text{HAuCl}_4$ .

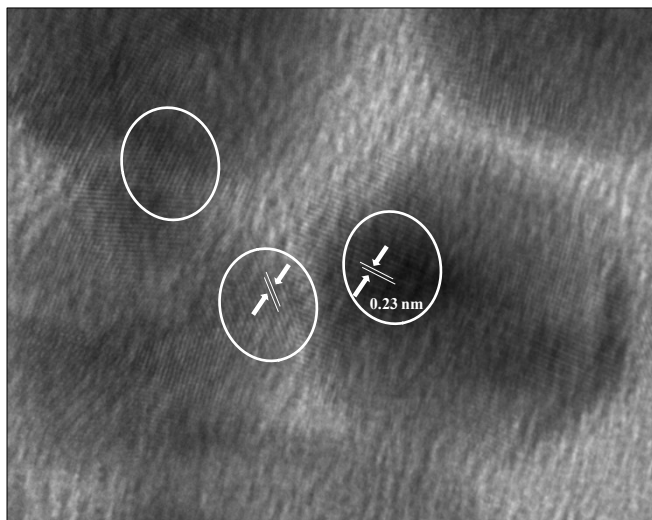

**Figure S4:** HRTEM image of synthesized Au@CDs. The atomic spacing was found to be 0.23 nm which corresponds to (111) plane.
